# Supplementary material for: Identifying Stabilin-1 and Stabilin-2 Double Knockouts in Reproduction and Placentation: A Descriptive Study
Source: PubMed Central journal article supplement (PMC7583024; doi:10.3390/ijms21197235), 2020-09-30
Supplement: ijms-21-07235-s001.pdf [file ijms-21-07235-s001.pdf]

# Identifying Stabilin-1 and Stabilin-2 Double Knockouts in Reproduction and Placentation: A Descriptive Study

Soon-Young Kim <sup>1,2</sup>, Eun-Hye Lee <sup>1</sup>, Eun Na Kim <sup>3</sup>, Woo-Chan Son <sup>3</sup>, Yeo Hyang Kim <sup>4,5</sup>, Seung-Yoon Park <sup>6</sup>, In-San Kim <sup>7,8</sup> and Jung-Eun Kim <sup>1,2,\*</sup>

\* Correspondence: [kjeun@knu.ac.kr](mailto:kjeun@knu.ac.kr)

## Supplementary Materials

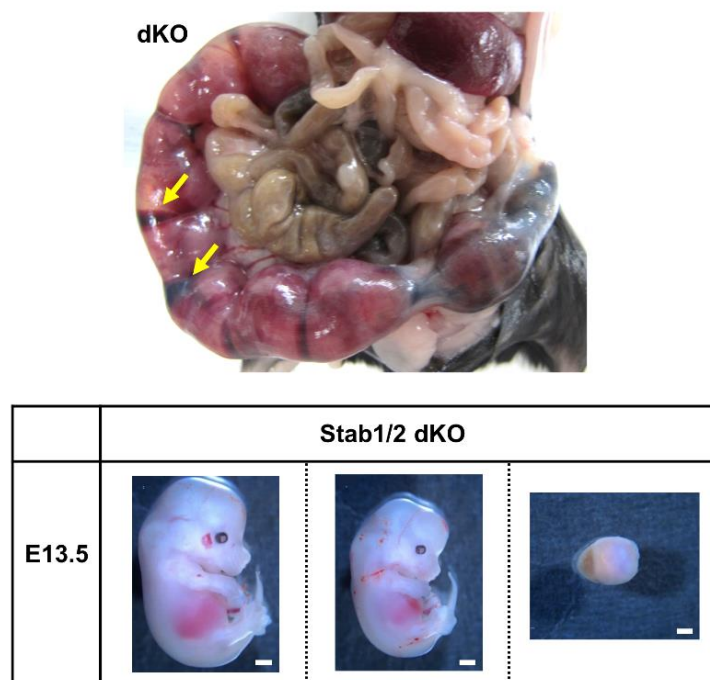

**Figure S1.** Uterine horns with E13.5 embryos in pregnant Stab1/2 dKO mice. Yellow arrows in Stab1/2 dKO indicate blood within uterine horns. High-magnification images of unevenly sized embryos or undefined tissue at E 13.5. Scale bar, 1 mm

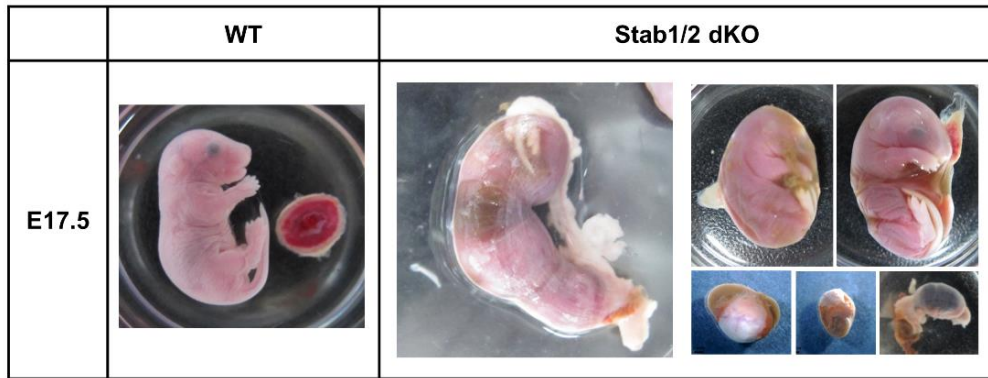

**Figure S2.** Images of unevenly sized embryos or undefined tissue in pregnant Stab1/2 dKO mice compared to normal-sized embryo and placenta of pregnant WT mice at E17.5.

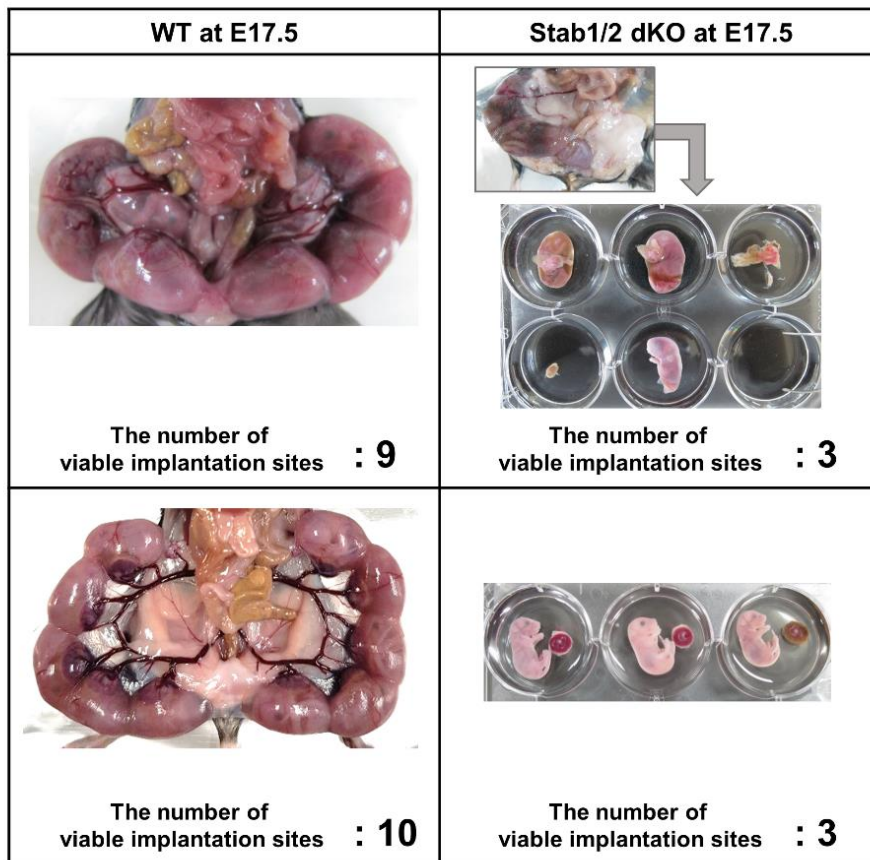

**Figure S3.** Images of the uteri or E17.5 embryos in WT and Stab1/2 dKO females and the number of viable implantation sites

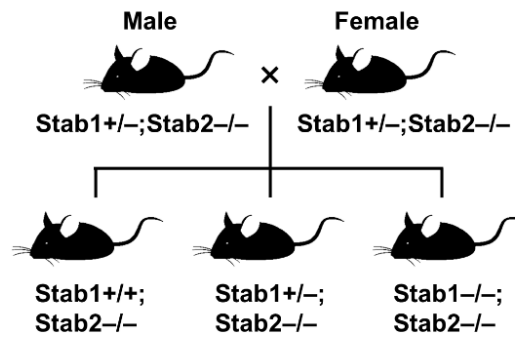

| Genotype of Pups   | Number |
|--------------------|--------|
| Stab1+/-; Stab2-/- | 11     |
| Stab1+/-; Stab2-/- | 47     |
| Stab1-/-; Stab2-/- | 3      |

**Figure S4.** Pedigree and the number of pups generated by crossing between male and female mice with Stab1 heterozygous and Stab2 knockout genotypes. WT, +/+; heterozygous, +/-; knockout, -/-
